# Supplementary material for: ヘンリー・フィールディングの小説『トム・ジョーンズ』
Source: MDPI journal article supplement (doi:10.3390/pathogens11111299), 2000-08-31
Supplement: s1 [file s1]

**Supplementary Table S1.** Phenotypic characteristic of the *Aeromonas lusitana* Mexican strain (ESV-351) isolated from gills of rainbow trout obtained with conventional biochemical tests and with the MicroScan (W/A) identification system.

|                        | Biochemical results |                |                              | Biochemical results |           |
|------------------------|---------------------|----------------|------------------------------|---------------------|-----------|
|                        | Conventional        | MicroScan      |                              | Conventional        | MicroScan |
| <b>Test</b>            |                     |                | <b>Test</b>                  |                     |           |
| Motility               | +                   | ND             | <u>Acid from:</u>            |                     |           |
| Oxidase                | +                   | ND             | D-adonitol                   | ND                  | -         |
| Catalase               | +                   | ND             | D-cellobiose                 | -                   | ND        |
| ADH                    | +                   | -              | D-mannitol                   | +                   | ND        |
| LDC                    | +                   | -              | D-sorbitol                   | -                   | -         |
| ODC                    | -                   | -              | Glucose                      | ND                  | +         |
| Tryptophan deaminase   | ND                  | -              | Glycerol                     | +                   | ND        |
| Indole                 | +                   | - <sup>a</sup> | L- Arabinose                 | -                   | ND        |
| ONPG                   | +                   | -              | L- Rhamnose                  | -                   | ND        |
| Urea                   | -                   | -              | D-lactose                    | -                   | ND        |
| H <sub>2</sub> S       | -                   | -              | D-mellobiose                 | ND                  | -         |
| VP                     | -                   | -              | <i>m</i> -Inositol           | -                   | -         |
| MR                     | +                   | ND             | D-raffinose                  | ND                  | ND        |
| Gelatin                | +                   | ND             | D-sacarose                   | +                   | ND        |
| DNase                  | +                   | ND             | Salicin                      | +                   | ND        |
| Glucose (gas)          | +                   | ND             | Sucrose                      | -                   | -         |
| Nitrate reduction      | +                   | +              |                              |                     |           |
| β-Hemolysis            | +                   |                | <u>Hydrolysis of:</u>        |                     |           |
|                        |                     |                | Aesculin                     | +                   | -         |
| <u>Utilization of:</u> |                     |                | SDS                          | -                   | ND        |
| Citrate                | +                   | -              | Starch                       | +                   | ND        |
| DL-Lactate             | -                   | ND             |                              |                     |           |
| Malonate               | ND                  | -              | <u>Resistance to :</u>       |                     |           |
| Acetamide              | ND                  | -              | Chepalothin                  | ND                  | +         |
| Tartrate               | ND                  | -              | Colistin                     | ND                  | -         |
|                        |                     |                | Kanamycin                    | ND                  | +         |
| <u>Growth in:</u>      |                     |                | Nitrofurantoin               | ND                  | -         |
| 0% NaCl                | +                   | ND             | O /129 <sup>b</sup> (150 µg) | +                   | ND        |
| 4.5% NaCl              | +                   | ND             | Penicillin                   | ND                  | +         |
| 6% NaCl                | -                   | ND             | Tobramycin                   | ND                  | -         |
| Cetridime              | ND                  | -              |                              |                     |           |
| Growth at 42°C         | -                   | ND             |                              |                     |           |

ADH: Arginine dihydrolase; LDC: Lysine decarboxylase; ODC: Ornithine decarboxylase; ONPG: *o*-nitrophenyl-β-D-galactopyranoside; VP: Voges-Proskauer; MR: Methyl Red. <sup>a</sup> Negative in two of three repetitions; <sup>b</sup> Vibriostatic agent (2,4-diamino-6,7diisopropylpteridine) (150 µg / disk); ND: Not Done.
